# Supplementary material for: Sulfonate anionic small molecule as a cathode interfacial material for highly efficient polymer solar cells
Source: Royal Society of Chemistry journal article supplement (doi:10.1039/c6ra05598b), 2016-01-01
Supplement: c6ra05598b1.pdf [file c6ra05598b1.pdf]

## Electronic Supplementary Information

### Sulfonate anionic small molecules as cathode interfacial materials for highly efficient polymer solar cells

Changjian Song,<sup>a,b</sup> Xiaohui Liu,<sup>b</sup> Xiaodong Li,<sup>b</sup> Wenjun Zhang,<sup>b\*</sup> Yueling Bai,<sup>a</sup> and Junfeng Fang<sup>b\*</sup>

<sup>a</sup> Department of Chemistry, College of Science, Shanghai University, Shanghai 200444, China.

<sup>b</sup> Ningbo Institute of Materials Technology and Engineering, Chinese Academy of Sciences, Ningbo 315201, China.

E-mail: zhangwenjun@nimte.ac.cn and fangjf@nimte.ac.cn

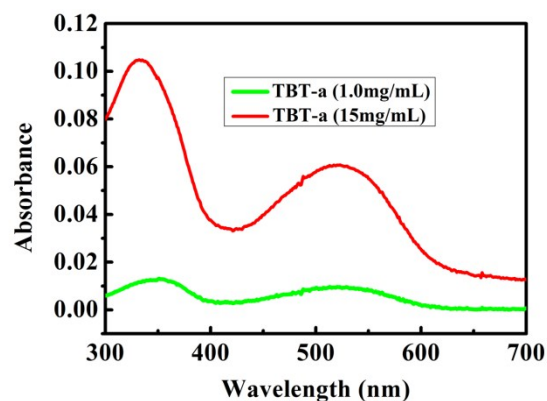

**Fig. S1** The absorbance of different TBT-a films.

**Table S1.** The  $abs_{max}$  and relative thickness of different TBT-a films

| Interlayer       | $Abs_{max}$ | Relative thickness (nm) |      |      |      |      |      |         |
|------------------|-------------|-------------------------|------|------|------|------|------|---------|
|                  |             | 1                       | 2    | 3    | 4    | 5    | 6    | Average |
| TBT-a (15mg/mL)  | 0.105       | 76.0                    | 76.2 | 72.6 | 70.9 | 72.8 | 70.1 | 73.1    |
| TBT-a (1.0mg/mL) | 0.013       | /                       | /    | /    | /    | /    | /    | 9.0     |

The thickness of TBT-a film (15 mg/mL) was determined by the Veeco profiler (Dektak 150) for 73.1 nm, while the thickness of TBT-a film was estimated by an absorbance-thickness curve that assumed a linear dependence of the absorbance at 336 nm on thickness.<sup>1</sup> The result was shown in Table S1. When TBT-a concentration was 1.0 mg/mL, the thickness of TBT-a film was about 9 nm.



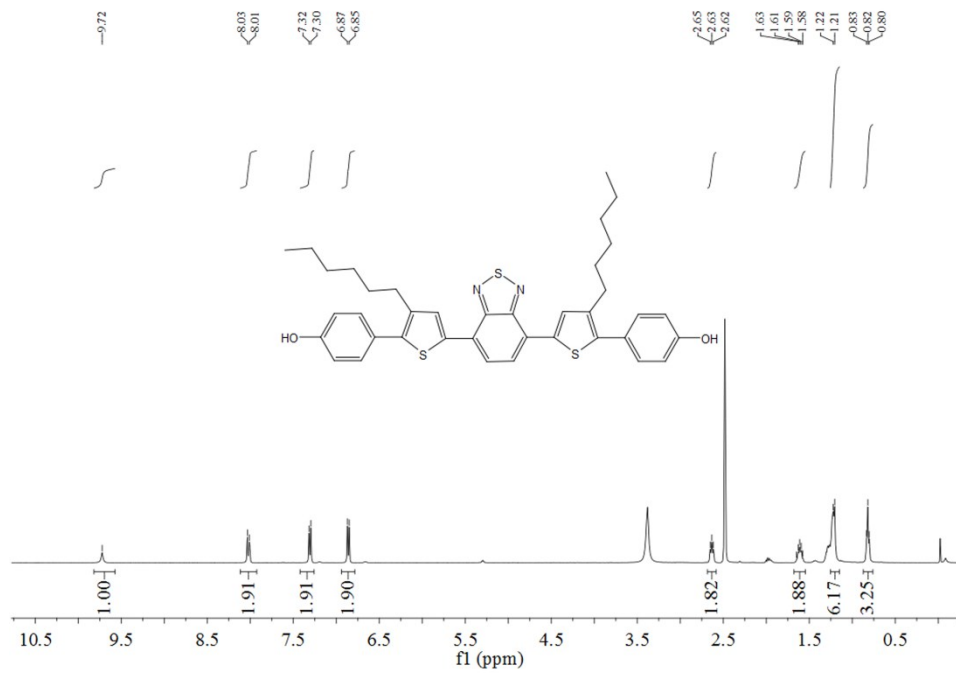

**Fig.S4**  $^1\text{H NMR}$  of **3**

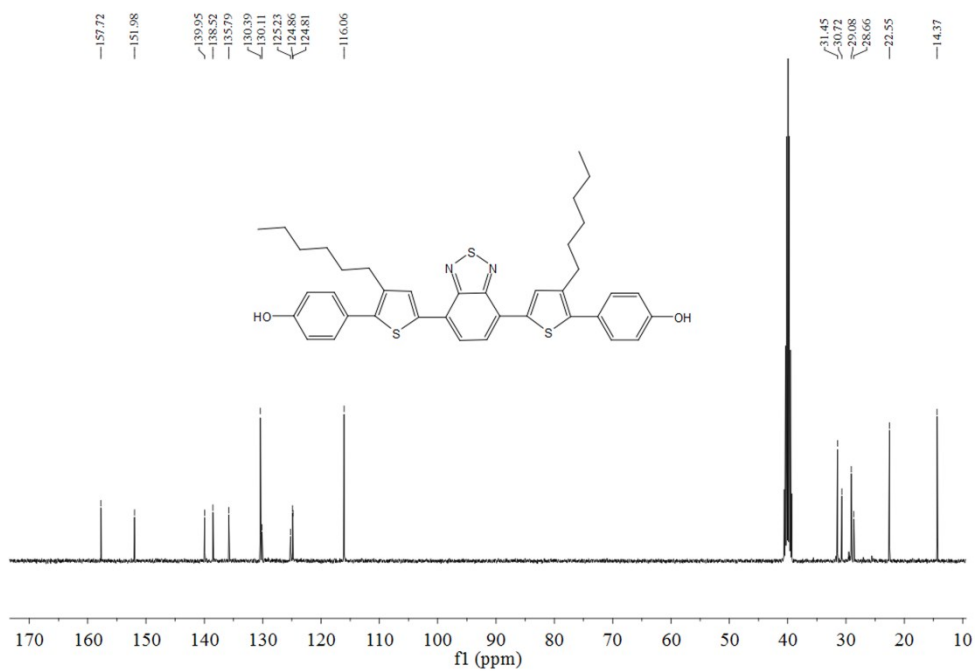

**Fig.S5**  $^{13}\text{C NMR}$  of **3**

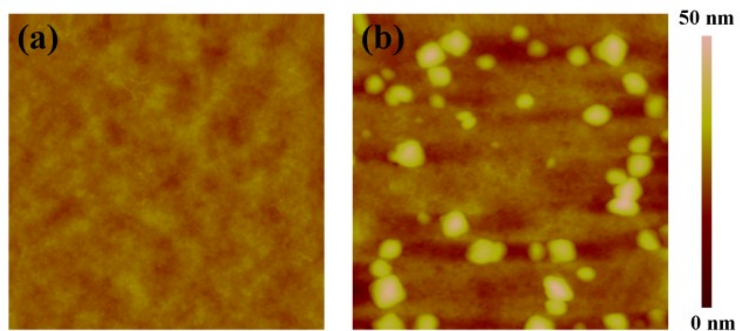

**Fig. S6** Tapping-mode AFM images: the surface of the PTB7:PC71BM (a) treated by MeOH, RMS = 1.13 nm and (b) with TBT-a interlayer, RMS = 3.41 nm. (size: 2.5 $\mu$ m $\times$ 2.5 $\mu$ m)

#### Reference

1. S. Liu, Zhang, K., Lu, J., Zhang, J., Yip, H. L., Huang, F. and Cao, Y., *J Am Chem Soc*, 2013, **135**, 15326-15329.
